# Supplementary material for: Localised Infection of Atlantic Salmon Epithelial Cells by HPR0 Infectious Salmon Anaemia Virus
Source: PubMed Central journal article supplement (PMC4801213; doi:10.1371/journal.pone.0151723), 2016-03-21
Supplement: pone.0151723.s001.pdf [file pone.0151723.s001.pdf]

*Table S1. RT-qPCR of gills and IHC on formalin fixed paraffin embedded gills from farm II.*

ISAV segment 8 and ELF RT-qPCR Ct values and IHC using antibody to ISAV NP on gills from farm II. +, positive labelling of epithelial cells in the gill. -, negative. Nt: not tested. All fish were positive for HPR0 by RT-qPCR, but only 17 of 40 were positive by IHC.

| Fish | ISAV Ct | ELF Ct | Gill IHC |
|------|---------|--------|----------|
| 1    | 30.02   | 20.47  | -        |
| 2    | 20.03   | 19.30  | +        |
| 3    | 21.75   | 19.63  | +        |
| 4    | 18.57   | nt     | +        |
| 5    | 26.97   | 19.68  | -        |
| 6    | 33.06   | 19.62  | -        |
| 7    | 28.88   | 20.04  | +        |
| 8    | 30.51   | 19.86  | -        |
| 9    | 23.11   | 20.24  | +        |
| 10   | 22.06   | 19.94  | +        |
| 11   | 30.44   | 19.89  | +        |
| 12   | 27.43   | 19.86  | -        |
| 13   | 20.87   | 19.37  | +        |
| 14   | 29.36   | 19.03  | -        |
| 15   | 28.97   | 19.50  | -        |
| 16   | 20.71   | 19.31  | +        |
| 17   | 31.73   | 19.68  | -        |
| 18   | 19.02   | nt     | +        |
| 19   | 28.12   | 20.09  | -        |
| 20   | 23.85   | 20.06  | +        |
| 21   | 28.97   | 20.39  | -        |
| 22   | 26.47   | 19.52  | -        |
| 23   | 22.17   | 20.29  | +        |
| 24   | 26.22   | 20.05  | -        |
| 25   | 29.84   | 20.25  | -        |
| 26   | 20.85   | 20.03  | -        |
| 27   | 29.23   | 19.27  | -        |
| 28   | 27.55   | 20.23  | +        |
| 29   | 21.06   | 20.50  | +        |
| 30   | 29.48   | 20.10  | -        |
| 31   | 29.33   | 19.39  | -        |
| 32   | 24.05   | 21.64  | -        |
| 33   | 25.94   | 19.35  | -        |
| 34   | 24.72   | 20.72  | +        |
| 35   | 23.60   | 19.91  | +        |
| 36   | 31.56   | 19.86  | -        |
| 37   | 21.07   | 20.38  | +        |
| 38   | 20.86   | 19.22  | -        |
| 39   | 26.30   | 19.59  | -        |
| 40   | 21.57   | 20.55  | -        |
